# Supplementary material for: Intestinal Anti-Inflammatory Activity of the Aqueous Extract from Ipomoea asarifolia in DNBS-Induced Colitis in Rats
Source: PubMed Central journal article supplement (PMC6321343; doi:10.3390/ijms19124016), 2018-12-12
Supplement: ijms-19-04016-s001.pdf [file ijms-19-04016-s001.pdf]

SUPPLEMENTARY MATERIAL

**TABLE 1.** Effect of administration by gavage of the aqueous extract of *Ipomoea asarifolia* on glucose, triglycerides, total cholesterol, somnolence, tremors, convulsions, palpebral ptosis, piloerection, salivation, diarrhea, mortality and weight.

| Groups     | Glucose mg/dL  | TG mg/dL      | CT mg/dL      | Somnolence | Tremors | Convulsion | Ptosis  | Piloerection | Salivation | Diarrhea | Mortality-Number per group/death | Weith 1 <sup>o</sup> day | Weith 3 <sup>o</sup> day |
|------------|----------------|---------------|---------------|------------|---------|------------|---------|--------------|------------|----------|----------------------------------|--------------------------|--------------------------|
| H (saline) | 107,80 ± 17,60 | 33,33 ± 4,80  | 60,00 ± 11,58 | absence    | absence | absence    | absence | absence      | absence    | absence  | 8/0                              | 192 ± 2,64               | 183,33 ± 1,52            |
| IA 25      | 120,29 ± 41,65 | 48,50 ± 18,96 | 65,71 ± 10,36 | absence    | absence | absence    | absence | absence      | absence    | absence  | 8/0                              | 197,87 ± 20, 35          | 184,25 ± 18, 86          |
| IA 50      | 80,17 ± 27,13  | 38,00 ± 11,03 | 77,33 ± 19,65 | absence    | absence | absence    | absence | absence      | absence    | absence  | 8/0                              | 194,12 ± 13,24           | 183,5 ± 9,76             |
| IA 100     | 72,67 ± 25,16  | 43,83 ± 6,79  | 70,29 ± 8,32  | absence    | absence | absence    | absence | absence      | absence    | absence  | 8/0                              | 194,12 ± 21,44           | 191,5 ± 19,96            |

Values represent the mean ± SEM (n = 8/group). TC, total cholesterol; TG, Triglycerides. Healthy group, H; and 25, 50 and 100 mg/Kg doses of *I. asarifolia*, IA.
